# Supplementary material
Source: publisher site journal article supplement (https://www.dovepress.com/article/130794)
Supplement: Supplementary file 1 [file get_supplementary_file.php]

## Supplementary material

### Supplementary figure 1: Detailed search string used in the electronic database PubMed

```
(((((((((multi[tiab] OR multiple[tiab] OR inter[tiab] OR intra[tiab] OR combi*[tiab] OR combination[tiab] OR combinatorial[tiab] OR fusion[tiab]) AND (domain[tiab] OR component[tiab] OR compartment[tiab] OR conjunction[tiab] OR department[tiab] OR disciplin*[tiab] OR district[tiab])) OR "Interdisciplinary Studies"[Mesh] OR supplement*[tiab] OR multidomain*[tiab] OR multicomponent*[tiab] OR multicompartament[tiab] OR multidepartment[tiab] OR multidisciplin*[tiab] OR multidistrict[tiab] OR interdisciplin*[tiab] OR interdepartment[tiab] OR additionally[tiab] OR additional[tiab]))) AND (Nutrition[MeSH] OR nutri*[tiab] OR "Nutritional status"[MeSH] OR "Nutrition Therapy"[Mesh] OR "Diet Therapy"[Mesh] OR "Diet"[MeSH] OR diet[tiab] OR diets[tiab] OR "dietary supplements"[MeSH] OR dietary[tiab] OR supplement*[tiab] OR "Food, Fortified"[Mesh] OR "Food, Formulated"[Mesh] OR food[tiab] OR foods[tiab] OR "dietary proteins"[MeSH] OR "dietary protein"[tiab] OR "dietary proteins"[tiab] OR "energy intake"[MeSH] OR "Vitamins"[Mesh] OR "vitamin*"[tiab] OR "Antioxidants"[Mesh] OR "antioxidant*"[tiab] OR "Calcium"[Mesh] OR "calcium"[tiab] OR "Micronutrients"[Mesh] OR "micronutrient*"[tiab] AND "Minerals"[Mesh] OR "mineral*"[tiab] OR "Physical Fitness"[Mesh] OR "Exercise Therapy"[Mesh:noexp] OR "Physical Therapy Modalities"[Mesh:noexp] OR "exercise therapy"[tiab] OR exercise program*[tiab] OR physical exercise[tiab] OR fit[tiab] OR fitness[tiab] OR "Exercise Movement Techniques"[Mesh] OR "Circuit-Based Exercise"[Mesh] OR endurance[tiab] OR aerobic[tiab] OR "Physical Conditioning, Human"[Mesh] OR "Resistance Training"[Mesh] OR "resistance training"[tiab] OR "resistance exercise"[tiab] OR "resistance exercises"[tiab] OR "Weight Lifting"[Mesh] OR weight lift*[tiab] OR progressive resist*[tiab] OR "Muscle Strength"[Mesh] OR strength*[tiab] OR strengthen*[tiab] OR muscle volume[tiab] OR stretching[tiab] OR stretch[tiab] OR "Muscle Stretching Exercises"[Mesh] OR "Isometric Contraction"[Mesh] OR "Isotonic Contraction"[Mesh] OR isometric*[tiab] OR isokinetic*[tiab] OR isotonic*[tiab] OR eccentric[tiab] OR concentric[tiab] OR balance exercise*[tiab] OR stability training[tiab] OR "Gymnastics"[Mesh] OR gymnastic*[tiab] OR treadmill[tiab] OR walking[tiab] OR jogging[tiab] OR jogged[tiab] OR run*[tiab] OR swim*[tiab] OR bicycl*[tiab] OR cycling[tiab] OR pilates[tiab] OR yoga[tiab] OR tai ji[tiab] OR tai chi[tiab] OR taiji[tiab] OR dance therapy[tiab] OR "Dance Therapy"[Mesh] OR danc*[tiab] OR vibration[tiab] OR cardio training[tiab] OR jump[tiab] OR jumping[tiab] OR rowing[tiab] OR "Testosterone"[Mesh] OR testosterone[tiab] OR "Anabolic Agents"[Mesh] OR anabol*[tiab] OR "Human Growth Hormone"[Mesh] OR "Growth Hormone"[Mesh] OR growth hormone[tiab] OR "Insulin-Like Growth Factor I"[Mesh] OR insulin like growth factor[tiab] OR IGF[tiab] OR myostatin inhibitors[tiab] OR "Angiotensin-Converting Enzyme Inhibitors"[Mesh] OR ACE-I[tiab] OR angiotensin converting enzyme[tiab] OR "Occupational Therapy"[Mesh] OR "Occupational therapy"[tiab] OR "Occupational therapies"[tiab] OR functional therapy[tiab] OR functional therapies[tiab] OR "Social Support"[Mesh] OR Social Support[tiab] OR Social Supports[tiab] OR Psychosocial[tiab] OR Psychological[tiab] OR psychomotor*[tiab] OR social[tiab] OR cogniti*[tiab] OR mental training[tiab] OR "mental activity"[tiab] OR "mental activities"[tiab] OR reasoning[tiab] OR memory training[tiab] OR "Attention"[Mesh] OR attention[tiab] OR "processing speed"[tiab] OR concentration[tiab])) AND (((("Frail Elderly"[Mesh] OR frail*[tiab] OR prefrail*[tiab] OR pre frail*[tiab] OR ("Aged"[Mesh:noexp] OR aged[tiab] OR aging[tiab] OR ageing[tiab] OR elder*[tiab] OR "Aged, 80 and over"[Mesh] OR oldest old[tiab] OR old*[tiab] OR senior*[tiab]) AND (fragil*[tiab] OR vulnerab*[tiab]))) NOT (Editorial[ptyp] OR Letter[ptyp] OR Case Reports[ptyp]))) AND (((("dutch"[Language] OR "english"[Language] OR "french"[Language] OR "german"[Language]))
```

| <b>Supplementary table 1a: Exclusion reasons</b> |            |
|--------------------------------------------------|------------|
| Reason for exclusion                             | References |
| Abstract/commentary/summary or letter            | 1-44       |
| Research design                                  | 45-57      |
| Other/no outcomes                                | 58-82      |
| Other population                                 | 83-128     |
| No multi-domain intervention                     | 129-133    |
| No appropriate intervention                      | 134-144    |
| No differentiation of intervention effects       | 145-190    |
| Duplicates                                       | 190-200    |

| <b>Supplementary table 1b: Refences:</b>                                                                                                                                                                                                                                                                    |
|-------------------------------------------------------------------------------------------------------------------------------------------------------------------------------------------------------------------------------------------------------------------------------------------------------------|
| 1. P. Abizanda, M. Diez, V. Pérez, A. Da Silva, J. Estrella, K. Araujo, et al. Study to assess the effects of a nutritional formula plus exercise intervention in the functional capacities of frail institutionalized elderly patients: ACTIVNES study. <i>European Geriatric Medicine</i> . 2014;5:S78.   |
| 2. R. Bernabei, M. Cesari and F. Landi. Physical frailty and sarcopenia: Background, rationale, and design of the SPRINT-T project. <i>European Geriatric Medicine</i> . 2014;5:S33-S34.                                                                                                                    |
| 3. S. S. Booker, D. A. Bartoszczyk and K. A. Herr. Managing pain in frail elders. <i>American Nurse Today</i> . 2016;11(4):14-14.                                                                                                                                                                           |
| 4. B. Bortolato, S. Morlino, M. Catanzaro, A. Tafa, G. Petralia, E. Bonetto, et al. Multidimensional geriatric evaluation at initial treatment in urological neoplasms: A multicenter prospective study. <i>Anticancer Research</i> . 2015;35(6):3696-3697.                                                 |
| 5. M. Conradsson, Y. Gustafson, H. Holmberg, N. Lindelof, H. Littbrand, P. Nordstrom, et al. Effects of a high-intensity exercise program on well-being among older people with dementia living in care facilities: A cluster-randomized trial. <i>Physiotherapy (United Kingdom)</i> 2015. p. eS263-eS264. |
| 6. U. Dapp, J. A. M. Anders, J. J. M. Suijker and M. P. Bjorkman. Various aspects of interventions on physical functioning in community dwelling older persons. <i>European Geriatric Medicine</i> . 2014;5:S26-S27.                                                                                        |
| 7. J. Delrieu, P. Payoux, A. Hitzel, S. Peiffer, G. Abellan Van Kan, S. Gillette, et al. Multidomain alzheimer's disease preventive trial: Florbetapir ancillary study. <i>Alzheimer's and Dementia</i> . 2011;7(4):S419.                                                                                   |
| 8. S. Eichler, A. Salzwedel, A. Harnath, W. Kamke, C. Butter, M. Kraehe, et al. Frailty and exercise capacity as meaningful parameters for postinterventional care in patients with transcatheter aortic valve implantation. <i>European Journal of Preventive Cardiology</i> . 2015;22(1):S13.             |
| 9. P. Engel, A. Morgan and J. Spencer. Integrating comprehensive dementia care into the medical home: The geriatrics in primary care demonstration. <i>Alzheimer's and Dementia</i> . 2013;9(4):P118-P119.                                                                                                  |
| 10. P. A. Engel, A. Morgan and J. Spencer. Geriatrics in primary care: Integrating comprehensive geriatric care into the medical home. <i>Journal of the American Geriatrics Society</i> . 2012;60:S55.                                                                                                     |
| 11. N. Fairhall, C. Sherrington, S. Lord, K. Susan and I. Cameron. A multifactorial interdisciplinary intervention reduces frailty, increases function and is cost-effective in older adults who are frail: Randomised controlled trial. <i>Physiotherapy (United Kingdom)</i> 2015. p. eS371-eS372.        |
| 12. S. Gillette. The multidomain Alzheimer preventive trial (MAPT): A new approach for the prevention of Alzheimer's disease. <i>Alzheimer's and Dementia</i> . 2009;5(4):145.                                                                                                                              |
| 13. S. Greenspan, M. A. Ferchak, S. Perera, D. Nace and N. Resnick. Against all odds: Results from the zest trial in long term care residents. <i>Journal of bone and mineral research</i> 2013.                                                                                                            |

|     |                                                                                                                                                                                                                                                                                                                                             |
|-----|---------------------------------------------------------------------------------------------------------------------------------------------------------------------------------------------------------------------------------------------------------------------------------------------------------------------------------------------|
| 14. | S. Grenier, M. C. Payette, J. Filiatrault, L. Bherer, M. A. Bruneau, F. Benyebdri, et al. Multicomponent intervention strategies for managing fear of falling and related anxiety in older people. <i>International Psychogeriatrics</i> . 2015;27:S31-S32.                                                                                 |
| 15. | G. Guyonnet Sophie, B. Vellas, A. Sandrine, D. Charlotte and C. Isabelle. Mapt study: A 3-year randomized trial of omega 3 and/or multidomain intervention for the prevention of cognitive decline in frail elderly subjects-rationale, design and baseline data. <i>Alzheimer's and Dementia</i> . 2011;7(4):S97-S98.                      |
| 16. | T. Hadid and S. Sanchez-Reilly. Implications of interdisciplinary palliative care when caring for older adults with advanced cancer. <i>Journal of Pain and Symptom Management</i> . 2010;39(2):394.                                                                                                                                        |
| 17. | M. Imaoka, Y. Higuchi, E. Todo, K. Hirasima, T. Kitagawa, T. Ueda, et al. Intervention for falls: Reduced exercise and vitamin D supplementation among the institutionalized frail elderly. <i>Physiotherapy (United Kingdom)</i> 2015. p. eS641.                                                                                           |
| 18. | K. Ishikawa-Takata, M. Nagaya, M. Nakazawa and T. Ohta. Exercise without Digestive Enzyme Supplementation Worsens Nutritional Status of Frail Older Women. <i>Journal of the American Geriatrics Society</i> . 2015;63(2):386-388 3p.                                                                                                       |
| 19. | S. Jaimungal, E. Talebi Quje, C. May, D. Loreck, N. Brandt, K. Mordecai, et al. Preventing institutionalization and supporting caregivers through expanded services (PISCES) program within a veterans affairs geriatrics clinic. <i>Journal of the American Geriatrics Society</i> . 2015;63:S217-S218.                                    |
| 20. | R. Kandel, P. Chatterjee, V. Kumar, V. Gopalan, A. Ambashtha, S. Jathar, et al. Impact of nutritional supplementation and nordic walking in frail older patients in geriatrics department of tertiary care hospital in India. <i>European geriatric medicine</i> 2014. p. S127-s128.                                                        |
| 21. | C. Kennedy, P. Novotny, N. LeBrasseur, R. Wise, F. Sciruba and R. Benzo. Does pulmonary rehabilitation impact frailty? <i>American Journal of Transplantation</i> . 2015;15.                                                                                                                                                                |
| 22. | A. M. Kenny, R. S. Boxer, A. Kleppinger, J. Brindisi, R. Feinn and J. A. Burleson. Dehydroepiandrosterone (DHEA) improves muscle strength and physical function but not bone mineral density in frail older women. <i>Journal of the American Geriatrics Society</i> . 2010;58:S98.                                                         |
| 23. | M. E. Keough, T. S. Field and J. H. Gurwitz. A model of community-based interdisciplinary team training in the care of the frail elderly. <i>Acad Med</i> . 2002;77(9):936.                                                                                                                                                                 |
| 24. | B. Kinosian, J. Yudin, A. Dannish, B. Boland, S. Touzell, M. Ann Forciea, et al. 5-year medicaid cost savings from medical duplexes: the elder partnership for all-inclusive care (EPAC). <i>Journal of General Internal Medicine</i> . 2011;26:S569.                                                                                       |
| 25. | N. K. Latham, C. S. Anderson, A. Lee, D. A. Bennett, A. Moseley, I. D. Cameron, et al. A randomized, controlled trial of quadriceps resistance exercise and vitamin D in frail older people: the Frailty Interventions Trial in Elderly Subjects (FITNESS). <i>Journal of the American Geriatrics Society</i> 2003 Mar;51(3):291-299. 2003. |
| 26. | E. Magett, L. Mailliard, M. Husingh-Scheetz and K. Thompson. The safe clinic: A geriatric model of care for frail older adults. <i>Journal of the American Geriatrics Society</i> . 2014;62:S137.                                                                                                                                           |
| 27. | J. Mahon, M. Murphy, M. O'Tuathail, Z. Hutchinson, D. O'Shea, M. Crowe, et al. The nursing home conundrum: A model for prospective interdisciplinary care. <i>Irish Journal of Medical Science</i> . 2014;183(7):S352-S353.                                                                                                                 |
| 28. | M. Markle-Reid. Frail elderly home care clients: The effects and expense of adding nursing health promotion and preventive care to personal support services. <i>McMaster University (Canada)</i> ; 2003. p. 305 p-305 p 1p.                                                                                                                |
| 29. | M. M. Markofski, K. L. Timmerman, J. M. Dickinson, P. T. Reidy, M. Borack, B. B. Rasmussen, et al. The acute aerobic exercise-induced increase in amino acid transporter expression adapts to exercise training in older adults. <i>FASEB Journal</i> . 2013;27.                                                                            |

|     |                                                                                                                                                                                                                                                                                                                                                                                 |
|-----|---------------------------------------------------------------------------------------------------------------------------------------------------------------------------------------------------------------------------------------------------------------------------------------------------------------------------------------------------------------------------------|
| 30. | B. Merle, R. Chapurlat, E. Vignot, T. Thomas, J. Haesebaert and A.-M. Schott. Post-fracture care: Do we need to educate the patients rather than the doctors? the prevost randomized control trial. <i>Osteoporosis international</i> 2016. p. S277.                                                                                                                            |
| 31. | D. Messecar. Resistance exercises or vitamin D did not improve physical health or reduce falls in frail older people. <i>Evidence Based Nursing</i> . 2003;6(4):116-117 2p.                                                                                                                                                                                                     |
| 32. | S. F. Metzethin, N. Bleijenberg, J. W. Blom and L. Imhof. Primary care strategies to maintain independence of frail older people: Looking for evidence across borders. <i>European Geriatric Medicine</i> . 2014;5:S31-S32.                                                                                                                                                     |
| 33. | P. Mrak, I. Rakovac, A. Morak, K. Kienreich, C. Fritz, T. R. Pieber, et al. Correlates of cognitive function measured in frail elderly patients with diabetes mellitus. <i>Diabetologia</i> . 2009;52(S1):S66-S67.                                                                                                                                                              |
| 34. | A. Mudge, C. Denaro and P. O'Rourke. Outcomes of hospital care in aged care residents. <i>Internal Medicine Journal</i> . 2010;40:39.                                                                                                                                                                                                                                           |
| 35. | T. P. Ng, L. M. Lim, M. Niti, L. Feng, M. S. Z. Nyunt, L. Feng, et al. Effects of nutritional, physical, cognitive interventions on cognitive outcomes in the Singapore frailty intervention trial (S-FIT). <i>Annals of the Academy of Medicine Singapore</i> . 2014;43(10):S68-S69.                                                                                           |
| 36. | M. S. Z. Nyunt, M. Niti, L. Feng, B. Y. Tan, G. Chan, S. M. Chan, et al. Singapore frailty intervention trial: Effect of frailty reversal on reducing depressive symptoms. <i>Annals of the Academy of Medicine Singapore</i> 2014. p. S29-s30.                                                                                                                                 |
| 37. | K. Ornstein, A. Wajnberg, M. Zhang, H. Kaye-Kauderer and T. Soriano. Symptom management over time among homebound patients receiving home-based primary and palliative care (SA527-A). <i>Journal of Pain and Symptom Management</i> . 2013;45(2):410-411.                                                                                                                      |
| 38. | C. Patterson, P. Boling, G. Taler, J. Yudin, K. E. Dejonge and B. Kinosian. Home based primary care integrated with supportive services avoids long-term institutionalization in frail, medically complex elders. <i>Journal of General Internal Medicine</i> . 2016;31(2):S90-S91.                                                                                             |
| 39. | R. D. Pollock, D. J. Newham and F. C. Martin. Randomised clinical trial of the effects of whole body vibration therapy, in addition to a supervised exercise programme, on measures of Falls related physical performance. <i>Age and ageing</i> 2011. p. ii52.                                                                                                                 |
| 40. | J. D. Schlaudecker, A. Shomo and R. Hart. Impact of daily bedside interprofessional rounds on mortality, falls, readmissions, and length of stay for a newly opened ace unit. <i>Journal of the American Geriatrics Society</i> . 2014;62:S222.                                                                                                                                 |
| 41. | M. Tieland, L. de Groot and L. van Loon. [Recent research: egg white supplementation during longterm resistance training increases muscle mass in the frail elderly]. <i>Tijdschr Gerontol Geriatr</i> . 2013;44(2):90-1.                                                                                                                                                       |
| 42. | M. Tieland, O. Rest, L. Verdijk, L. Groot and L. Loon. The effects of protein supplementation during prolonged resistance type exercise training on muscle mass and function in frail elderly. <i>Clinical Nutrition, Supplement</i> 2011. p. 111.                                                                                                                              |
| 43. | P. Tikkanen, E. Lönnroos, S. Sipilä, I. Nykänen, R. Sulkava and S. Hartikainen. Effects of CGA and multicomponent intervention on mobility of pre-frail and frail community-dwelling older people. <i>European Geriatric Medicine</i> . 2013;4:S14.                                                                                                                             |
| 44. | Y. Yoshimura, K. Uchida, T. Miyahara, T. Onishi, M. Okabe and Y. Tateyama. Impact of BCAA enriched nutritional support on rehabilitation in hospitalized frail elderly patients: A randomized cotrolled trial. <i>Clinical Nutrition</i> . 2013;32:S137.                                                                                                                        |
| 45. | P. Abizanda, M. D. Lopez, V. P. Garcia, D. Estrella Jde, A. da Silva Gonzalez, N. B. Vilardell, et al. Effects of an Oral Nutritional Supplementation Plus Physical Exercise Intervention on the Physical Function, Nutritional Status, and Quality of Life in Frail Institutionalized Older Adults: The ACTIVNES Study. <i>J Am Med Dir Assoc</i> . 2015;16(5):439 e9-439 e16. |

|     |                                                                                                                                                                                                                                                                                                             |
|-----|-------------------------------------------------------------------------------------------------------------------------------------------------------------------------------------------------------------------------------------------------------------------------------------------------------------|
| 46. | K. R. Allen, S. E. Hazelett, D. Jarjoura, K. Wright, S. M. Fosnight, D. J. Kropp, et al. The after discharge care management of low income frail elderly (AD-LIFE) randomized trial: theoretical framework and study design. <i>Popul Health Manag.</i> 2011;14(3):137-42.                                  |
| 47. | M. Bendayan, L. Bibas, M. Levi, L. Mullie, D. E. Forman and J. Afilalo. Therapeutic interventions for frail elderly patients: part II. Ongoing and unpublished randomized trials. <i>Prog Cardiovasc Dis.</i> 2014;57(2):144-51.                                                                            |
| 48. | L. Bibas, M. Levi, M. Bendayan, L. Mullie, D. E. Forman and J. Afilalo. Therapeutic interventions for frail elderly patients: part I. published randomized trials. <i>Progress in Cardiovascular Diseases</i> 2014 Sep-Oct;57(2):134-143. 2014.                                                             |
| 49. | P. Collier and A. Early. A team approach to geriatric case management. <i>J Case Manag.</i> 1995;4(2):66-70.                                                                                                                                                                                                |
| 50. | L. K. Evans, J. Yurkow and E. L. Siegler. The CARE Program: a nurse-managed collaborative outpatient program to improve function of frail older people. <i>Collaborative Assessment and Rehabilitation for Elders. J Am Geriatr Soc.</i> 1995;43(10):1155-60.                                               |
| 51. | N. Fairhall, C. Aggar, S. E. Kurrle, C. Sherrington, S. Lord, K. Lockwood, et al. Frailty Intervention Trial (FIT). <i>BMC Geriatr.</i> 2008;8:27.                                                                                                                                                          |
| 52. | N. Fairhall, S. E. Kurrle, C. Sherrington, S. R. Lord, K. Lockwood, B. John, et al. Effectiveness of a multifactorial intervention on preventing development of frailty in pre-frail older people: study protocol for a randomised controlled trial. <i>BMJ Open.</i> 2015;5(2):e007091.                    |
| 53. | M. Markle-Reid, G. Browne and A. Gafni. Nurse-led health promotion interventions improve quality of life in frail older home care clients: lessons learned from three randomized trials in Ontario, Canada. <i>J Eval Clin Pract.</i> 2013;19(1):118-31.                                                    |
| 54. | M. Nolan, D. Power, J. Long and F. Horgan. Frailty and its association with rehabilitation outcomes in a post-acute older setting. <i>International Journal of Therapy &amp; Rehabilitation.</i> 2016;23(1):33-40.                                                                                          |
| 55. | C. F. Thomas. A nurse led programme improved physical function in older adults with chronic disease [commentary on Leveille SG, Wagner EH, Davis C, et al. Preventing disability and managing chronic illness in frail older adults: a randomized trial of a. <i>Evidence Based Nursing.</i> 1999:86-86 1p. |
| 56. | J. Trueland. All in a day's work An innovative one-stop clinic is keeping frail older people out of hospital. <i>Nurs Stand.</i> 2014;28(26):24-5.                                                                                                                                                          |
| 57. | C. Wallace, L. Chandler, A. Rogers, K. Crosby, N. Joshi, T. Spriggs, et al. Caring for frail patients: best practice. <i>Nursing Standard.</i> 2012;26(28):50-56 7p.                                                                                                                                        |
| 58. | F. Aspinall, J. Glasby, T. Rostgaard, H. Tuntland and R. G. Westendorp. New horizons: Reablement - supporting older people towards independence. <i>Age Ageing.</i> 2016.                                                                                                                                   |
| 59. | N. Bleijenberg, V. H. Ten Dam, I. Drubbel, M. E. Numans, N. J. de Wit and M. J. Schuurmans. Treatment Fidelity of an Evidence-Based Nurse-Led Intervention in a Proactive Primary Care Program for Older People. <i>Worldviews Evid Based Nurs.</i> 2016;13(1):75-84.                                       |
| 60. | R. S. Boxer, A. Kleppinger, J. Brindisi, R. Feinn, J. A. Burleson and A. M. Kenny. Effects of dehydroepiandrosterone (DHEA) on cardiovascular risk factors in older women with frailty characteristics. <i>Age Ageing.</i> 2010;39(4):451-8.                                                                |
| 61. | S. Cameron, F. McKenzie, L. Warnock and D. Farquhar. Impact of a nurse led multidisciplinary team on an acute medical admissions unit. <i>Health Bull (Edinb).</i> 2000;58(6):512-4.                                                                                                                        |
| 62. | M. Cesari, L. Demougeot, H. Boccalon, S. Guyonnet, B. Vellas and S. Andrieu. The Multidomain Intervention to prevent disability in Elders (MINDED) project: rationale and study design of a pilot study. <i>Contemp Clin Trials.</i> 2014;38(1):145-54.                                                     |
| 63. | E. Damier, E. Chidlovskii, B. Bertrand, V. M. Dang, G. Vanzetto and P. Couturier. [Multidimensional geriatric assessment before transcatheter aortic valve implantation in frail elderly                                                                                                                    |

|                                                                                                                                                                                                                                                                                                                                               |
|-----------------------------------------------------------------------------------------------------------------------------------------------------------------------------------------------------------------------------------------------------------------------------------------------------------------------------------------------|
| patients with one-year follow-up. Cardio-geriatrician collaboration benefits?]. <i>Ann Cardiol Angeiol (Paris)</i> . 2016.                                                                                                                                                                                                                    |
| 64. T. E. Dorner, C. Lackinger, S. Haider, E. Luger, A. Kapan, M. Luger, et al. Nutritional intervention and physical training in malnourished frail community-dwelling elderly persons carried out by trained lay "buddies": study protocol of a randomized controlled trial. <i>BMC Public Health</i> . 2013;13:1232.                       |
| 65. J. Eckerblad, K. Theander, A. W. Ek Dahl and T. Jaarsma. Symptom trajectory and symptom burden in older people with multimorbidity, secondary outcome from the RCT AGE-FIT study. <i>J Adv Nurs</i> . 2016.                                                                                                                               |
| 66. M. A. Fiatarone, E. F. O'Neill, N. Doyle, K. M. Clements, S. B. Roberts, J. J. Kehayias, et al. The Boston FICSIT study: the effects of resistance training and nutritional supplementation on physical frailty in the oldest old. <i>J Am Geriatr Soc</i> . 1993;41(3):333-7.                                                            |
| 67. K. Frandin, H. Gronstedt, J. L. Helbostad, A. Bergland, M. Andresen, L. Puggaard, et al. Long-Term Effects of Individually Tailored Physical Training and Activity on Physical Function, Well-Being and Cognition in Scandinavian Nursing Home Residents: A Randomized Controlled Trial. <i>Gerontology</i> . 2016.                       |
| 68. S. Gillette-Guyonnet, S. Andrieu, T. Dantoine, J. F. Dartigues, J. Touchon and B. Vellas. Commentary on "A roadmap for the prevention of dementia II. Leon Thal Symposium 2008." The Multidomain Alzheimer Preventive Trial (MAPT): a new approach to the prevention of Alzheimer's disease. <i>Alzheimers Dement</i> . 2009;5(2):114-21. |
| 69. P. Harvey and D. Wilson. The role of the specialist nurse in an acute assessment and liaison service. <i>Nursing Older People</i> . 2009;21(10):24-28 5p.                                                                                                                                                                                 |
| 70. S. D. Horn, S. S. Sharkey, S. Hudak, J. Gassaway, R. James and W. Spector. Pressure ulcer prevention in long-term-care facilities: a pilot study implementing standardized nurse aide documentation and feedback reports. <i>Advances in Skin &amp; Wound Care</i> . 2010;23(3):120-131 12p.                                              |
| 71. N. Martínez-Velilla, A. Casas-Herrero, F. Zambom-Ferraresi, N. Suárez, J. Alonso-Renedo, K. Contín, et al. Functional and cognitive impairment prevention through early physical activity for geriatric hospitalized patients: study protocol for a randomized controlled trial. <i>BMC geriatrics</i> 2015. p. 112.                      |
| 72. S. F. Metzelthin, R. Daniels, E. van Rossum, K. Cox, H. Habets, L. P. de Witte, et al. A nurse-led interdisciplinary primary care approach to prevent disability among community-dwelling frail older people: a large-scale process evaluation. <i>Int J Nurs Stud</i> . 2013;50(9):1184-96.                                              |
| 73. R. Milte, M. D. Miller, M. Crotty, S. Mackintosh, S. Thomas, I. D. Cameron, et al. Cost-effectiveness of individualized nutrition and exercise therapy for rehabilitation following hip fracture. <i>Journal of Rehabilitation Medicine</i> 2016 Apr;48(4):378-385. 2016.                                                                 |
| 74. A. Moore, C. Patterson, J. White, S. T. House, J. J. Riva, K. Nair, et al. Interprofessional and integrated care of the elderly in a family health team. <i>Can Fam Physician</i> . 2012;58(8):e436-41.                                                                                                                                   |
| 75. K. Ornstein, A. Wajnberg, H. Kaye-Kauderer, G. Winkel, L. DeCherrie, M. Zhang, et al. Reduction in symptoms for homebound patients receiving home-based primary and palliative care. <i>J Palliat Med</i> . 2013;16(9):1048-54.                                                                                                           |
| 76. L. L. Popejoy, C. Galambos, F. Stetzer, M. Popescu, L. Hicks, M. A. Khalilia, et al. Comparing Aging in Place to Home Health Care: Impact of Nurse Care Coordination On Utilization and Costs. <i>Nurs Econ</i> . 2015;33(6):306-13.                                                                                                      |
| 77. L. Romera, F. Orfila, J. M. Segura, A. Ramirez, M. Moller, M. L. Fabra, et al. Effectiveness of a primary care based multifactorial intervention to improve frailty parameters in the elderly: a randomised clinical trial: rationale and study design. <i>BMC Geriatr</i> . 2014;14:125.                                                 |
| 78. T. Rosenberg. Acute Hospital Use, Nursing Home Placement, and Mortality in a Frail Community-Dwelling Cohort Managed with Primary Integrated Interdisciplinary Elder Care at Home. <i>Journal of the American Geriatrics Society</i> . 2012;60(7):1340-1346 7p.                                                                           |

|     |                                                                                                                                                                                                                                                                                                                                        |
|-----|----------------------------------------------------------------------------------------------------------------------------------------------------------------------------------------------------------------------------------------------------------------------------------------------------------------------------------------|
| 79. | M. Sandberg, U. Jakobsson, P. Midlov and J. Kristensson. Cost-utility analysis of case management for frail older people: effects of a randomised controlled trial. <i>Health Economics Review</i> 2015 May 30;5(12):Epub. 2015.                                                                                                       |
| 80. | T. Van Durme, O. Schmitz, S. Ces, S. Anthierens, P. Maggi, S. Delye, et al. A comprehensive grid to evaluate case management's expected effectiveness for community-dwelling frail older people: results from a multiple, embedded case study. <i>BMC Geriatr.</i> 2015;15:67.                                                         |
| 81. | B. Vellas, I. Carrie, S. Gillette-Guyonnet, J. Touchon, T. Dantoine, J. F. Dartigues, et al. Mapt study: a multidomain approach for preventing alzheimer's disease: design and baseline data. <i>J Prev Alzheimers Dis.</i> 2014;1(1):13-22.                                                                                           |
| 82. | B. Vellas, J. Touchon and M. Weiner. MAPT (multidomain Alzheimer preventive trial) imaging (MRI, FDG-PET, amyloid-PET) data. <i>Journal of Nutrition, Health and Aging.</i> 2012;16(9):812-815.                                                                                                                                        |
| 83. | S. Abe, O. Ezaki and M. Suzuki. Medium-chain triglycerides in combination with leucine and vitamin D increase muscle strength and function in frail elderly adults in a randomized controlled trial. <i>Journal of Nutrition.</i> 2016;146(5):1017-1026.                                                                               |
| 84. | N. C. Berkhout-Byrne, M. H. Kallenberg, T. J. Rabelink, S. P. Mooijaart, A. Gaasbeek and M. Van Buren. The nephrogeriatric clinical pathway: A new approach to treating pre-dialysis elderly patients in the netherlands. <i>Nephrology Dialysis Transplantation.</i> 2015;30:iii492-iii493.                                           |
| 85. | E. F. Binder. Implementing a structured exercise program for frail nursing home residents with dementia: issues and challenges. <i>Journal of Aging and Physical Activity</i> 1995 Oct;3(4):383-395. 1995.                                                                                                                             |
| 86. | M. Bonnefoy, F. Boutitie, C. Mercier, F. Gueyffier, C. Carre, G. Guetemme, et al. Efficacy of a home-based intervention programme on the physical activity level and functional ability of older people using domestic services: a randomised study. <i>The Journal of Nutrition, Health &amp; Aging</i> 2012 Apr;16(4):370-377. 2012. |
| 87. | M. Bonnefoy, C. Cornu, S. Normand, F. Boutitie, F. Bugnard, A. Rahmani, et al. The effects of exercise and protein-energy supplements on body composition and muscle function in frail elderly individuals: a long-term controlled randomised study. <i>The British Journal of Nutrition</i> 2003 May;89(5):731-739. 2003.             |
| 88. | R. S. Boxer, A. M. Kenny, B. J. Schmotzer, M. Vest, J. J. Fiutem and I. L. Pina. A randomized controlled trial of high dose vitamin D3 in patients with heart failure. <i>JACC Heart Fail.</i> 2013;1(1):84-90.                                                                                                                        |
| 89. | E. L. Cadore, A. B. Moneo, M. M. Mensat, A. R. Munoz, A. Casas-Herrero, L. Rodriguez-Manas, et al. Positive effects of resistance training in frail elderly patients with dementia after long-term physical restraint. <i>Age (Dordr).</i> 2014;36(2):801-11.                                                                          |
| 90. | I. M. Chapman, R. Visvanathan, A. J. Hammond, J. E. Morley, J. B. F. Field, K. Tai, et al. Effect of testosterone and a nutritional supplement, alone and in combination, on hospital admissions in undernourished older men and women. <i>American Journal of Clinical Nutrition.</i> 2009;89(3):880-889.                             |
| 91. | J. Collins, G. Longhurst, H. Roschel and B. Gualano. Resistance Training and Co-supplementation with Creatine and Protein in Older Subjects with Frailty. <i>The Journal of frailty &amp; aging</i> 2016. p. 126-34.                                                                                                                   |
| 92. | R. R. Deer, J. M. Dickinson, S. R. Fisher, H. Ju and E. Volpi. Identifying effective and feasible interventions to accelerate functional recovery from hospitalization in older adults: a randomized controlled pilot trial. <i>Contemporary Clinical Trials</i> 2016 Jul;49:6-14. 2016.                                               |
| 93. | A. Deschamps, C. Onifade, A. Decamps and I. Bourdel-Marchasson. Health-related quality of life in frail institutionalized elderly: effects of a cognition-action intervention and Tai Chi. <i>Journal of Aging and Physical Activity</i> 2009;17(2):236-248.                                                                           |
| 94. | A. Ekdahl, J. Alwin, J. Eckerblad, M. Husberg, T. Jaarsma, A. Mazya, et al. Long-Term Evaluation of the Ambulatory Geriatric Assessment: A Frailty Intervention Trial (AGe-FIT): Clinical                                                                                                                                              |

|                                                                                                                                                                                                                                                                                                                                                           |
|-----------------------------------------------------------------------------------------------------------------------------------------------------------------------------------------------------------------------------------------------------------------------------------------------------------------------------------------------------------|
| Outcomes and Total Costs After 36 Months. Journal of the American Medical Directors Association 2016. p. 263-8.                                                                                                                                                                                                                                           |
| 95. K. Eklund, K. Wilhelmson, H. Gustafsson, S. Landahl and S. Dahlin-Ivanoff. One-year outcome of frailty indicators and activities of daily living following the randomised controlled trial; "continuum of care for frail older people". BMC Geriatrics 2013 Jul 22;13(76):Epub. 2013.                                                                 |
| 96. M. C. Faes, M. F. Reelick, R. J. Melis, G. F. Borm, R. A. Esselink and M. G. Olde Rikkert. Multifactorial fall prevention for pairs of frail community-dwelling older fallers and their informal caregivers: a dead end for complex interventions in the frailest fallers. Journal of the American Medical Directors Association. 2011;12(6):451-458. |
| 97. M. A. Fiatarone, E. F. O'Neill, N. D. Ryan, K. M. Clements, G. R. Solares, M. E. Nelson, et al. Exercise training and nutritional supplementation for physical frailty in very elderly people. The New England Journal of Medicine 1994 Jun 23;330(25):1769-1775. 1994.                                                                               |
| 98. V. T. Grando, K. C. Buckwalter, M. L. Maas, M. Brown, M. J. Rantz and V. S. Conn. A trial of a comprehensive nursing rehabilitation program for nursing home residents post-hospitalization. Research in gerontological nursing 2009. p. 12-9.                                                                                                        |
| 99. S. L. Greenspan, S. Perera, M. A. Ferchak, D. A. Nace and N. M. Resnick. Efficacy and safety of single-dose zoledronic acid for osteoporosis in frail elderly women: a randomized clinical trial. JAMA Intern Med. 2015;175(6):913-21.                                                                                                                |
| 100. B. Gualano, A. R. Macedo, C. R. Alves, H. Roschel, F. B. Benatti, L. Takayama, et al. Creatine supplementation and resistance training in vulnerable older women: a randomized double-blind placebo-controlled clinical trial. Exp Gerontol. 2014;53:7-15.                                                                                           |
| 101. M. Holst, L. N. Søndergaard, M. D. Bendtsen and J. Andreasen. Functional training and timed nutrition intervention in infectious medical patients. European Journal of Clinical Nutrition. 2016.                                                                                                                                                     |
| 102. E. Hoogendijk, H. Horst, P. Ven, J. Twisk, D. Deeg, D. Frijters, et al. Effectiveness of a Geriatric Care Model for frail older adults in primary care: Results from a stepped wedge cluster randomized trial. European journal of internal medicine 2016. p. 43-51.                                                                                 |
| 103. A. D. Karelis, V. Messier, C. Suppere, P. Briand and R. Rabasa-Lhoret. Effect of cysteine-rich whey protein (immunocal(R)) supplementation in combination with resistance training on muscle strength and lean body mass in non-frail elderly subjects: a randomized, double-blind controlled study. J Nutr Health Aging. 2015;19(5):531-6.          |
| 104. A. M. Kenny, A. Kleppinger, K. Annis, M. Rathier, B. Browner, J. O. Judge, et al. Effects of transdermal testosterone on bone and muscle in older men with low bioavailable testosterone levels, low bone mass, and physical frailty. J Am Geriatr Soc. 2010;58(6):1134-43.                                                                          |
| 105. C. J. Liu, L. Y. Jones, A. R. Formyduval and D. O. Clark. Task-Oriented Exercise to Reduce ADL Disability in Vulnerable Elderly: A Feasibility Study of 3-Step Workout for Life. J Aging Phys Act. 2015.                                                                                                                                             |
| 106. M. Markle-Reid, R. Weir, G. Browne, J. Roberts, A. Gafni and S. Henderson. Health promotion for frail older home care clients. J Adv Nurs. 2006;54(3):381-95.                                                                                                                                                                                        |
| 107. A. L. Melin and L. O. Bygren. Efficacy of the rehabilitation of elderly primary health care patients after short-stay hospital treatment. Medical Care 1992 Nov;30(11):1004-1015. 1992.                                                                                                                                                              |
| 108. M. D. Miller, M. Crotty, C. Whitehead, E. Bannerman and L. A. Daniels. Nutritional supplementation and resistance training in nutritionally at risk older adults following lower limb fracture: a randomized controlled trial [with consumer summary]. Clinical Rehabilitation 2006 Apr;20(4):311-323. 2006.                                         |
| 109. M. Muller, A. W. van den Beld, Y. T. van der Schouw, D. E. Grobbee and S. W. Lamberts. Effects of dehydroepiandrosterone and atamestane supplementation on frailty in elderly men. J Clin Endocrinol Metab. 2006;91(10):3988-91.                                                                                                                     |



|                                                                                                                                                                                                                                                                                                                                                                                                         |
|---------------------------------------------------------------------------------------------------------------------------------------------------------------------------------------------------------------------------------------------------------------------------------------------------------------------------------------------------------------------------------------------------------|
| 110. N. Peel, M. Steinberg and G. Williams. Home safety assessment in the prevention of falls among older people. <i>Australian &amp; New Zealand Journal of Public Health</i> 2000 Oct;24(5):536-539. 2000.                                                                                                                                                                                            |
| 111. M. J. Peterson, R. Sloane, H. J. Cohen, G. M. Crowley, C. F. Pieper and M. C. Morey. Effect of telephone exercise counseling on frailty in older veterans: project LIFE. <i>American Journal of Men's Health</i> 2007 Dec;1(4):326-334. 2007.                                                                                                                                                      |
| 112. R. D. Pollock, F. C. Martin and D. J. Newham. Whole-body vibration in addition to strength and balance exercise for falls-related functional mobility of frail older adults: a single-blind randomized controlled trial [with consumer summary]. <i>Clinical Rehabilitation</i> 2012 Oct;26(10):915-923. 2012.                                                                                     |
| 113. A. Rodondi, P. Ammann, S. Ghilardi-Beuret and R. Rizzoli. Zinc increases the effects of essential amino acids-whey protein supplements in frail elderly. <i>J Nutr Health Aging</i> . 2009;13(6):491-7.                                                                                                                                                                                            |
| 114. E. Rosendahl, N. Lindelof, H. Littbrand, E. Yifter-Lindgren, L. Lundin-Olsson, L. Haglin, et al. High-intensity functional exercise program and protein-enriched energy supplement for older persons dependent in activities of daily living: a randomised controlled trial. <i>Aust J Physiother</i> . 2006;52(2):105-13.                                                                         |
| 115. S. Shinkai, H. Yoshida, Y. Taniguchi, H. Murayama, M. Nishi, H. Amano, et al. Public health approach to preventing frailty in the community and its effect on healthy aging in Japan. <i>Geriatrics and Gerontology International</i> . 2016;16:87-97.                                                                                                                                             |
| 116. H. Sievanen, S. Karinkanta, P. Moisio-Vilenius and J. Ripsaluoma. Feasibility of whole-body vibration training in nursing home residents with low physical function: a pilot study. <i>Aging Clinical and Experimental Research</i> 2014 Oct;26(5):511-517. 2014.                                                                                                                                  |
| 117. N. A. Singh, S. Quine, L. M. Clemson, E. J. Williams, D. A. Williamson, T. M. Stavrinou, et al. Effects of high-intensity progressive resistance training and targeted multidisciplinary treatment of frailty on mortality and nursing home admissions after hip fracture: a randomized controlled trial. <i>Journal of the American Medical Directors Association</i> 2012 Jan;13(1):24-30. 2012. |
| 118. S. Strike, A. Carlisle, E. Gibson and S. Dyal. A High Omega-3 Fatty Acid Multinutrient Supplement Benefits Cognition and Mobility in Older Women: A Randomized, Double-blind, Placebo-controlled Pilot Study. <i>The journals of gerontology. Series A, Biological sciences and medical sciences</i> 2016. p. 236-42.                                                                              |
| 119. D. H. Sullivan, P. K. Roberson, L. E. Johnson, O. Bishara, W. J. Evans, E. S. Smith, et al. Effects of muscle strength training and testosterone in frail elderly males. <i>Medicine and Science in Sports and Exercise</i> 2005 Oct;37(10):1664-1672. 2005.                                                                                                                                       |
| 120. D. H. Sullivan, P. K. Roberson, E. S. Smith, J. A. Price and M. M. Bopp. Effects of muscle strength training and megestrol acetate on strength, muscle mass, and function in frail older people. <i>Journal of the American Geriatrics Society</i> 2007 Jan;55(1):20-28. 2007.                                                                                                                     |
| 121. L. Tanajewski, M. Franklin, G. Gkountouras, V. Berdunov, J. Edmans, S. Conroy, et al. Cost-Effectiveness of a Specialist Geriatric Medical Intervention for Frail Older People Discharged from Acute Medical Units: Economic Evaluation in a Two-Centre Randomised Controlled Trial (AMIGOS). <i>PLoS One</i> . 2015;10(5):e0121340.                                                               |
| 122. R. M. Tappen, K. E. Roach, E. B. Applegate and P. Stowell. Effect of a combined walking and conversation intervention on functional mobility of nursing home residents with Alzheimer disease. <i>Alzheimer Dis Assoc Disord</i> . 2000;14(4):196-201.                                                                                                                                             |
| 123. L. Teri, L. E. Gibbons, S. M. McCurry, R. G. Logsdon, D. M. Buchner, W. E. Barlow, et al. Exercise plus behavioral management in patients with Alzheimer disease: a randomized controlled trial. <i>JAMA</i> 2003 Oct 15;290(15):2015-2022. 2003.                                                                                                                                                  |

|      |                                                                                                                                                                                                                                                                                                                                                        |
|------|--------------------------------------------------------------------------------------------------------------------------------------------------------------------------------------------------------------------------------------------------------------------------------------------------------------------------------------------------------|
| 124. | R. W. Toseland, J. C. O'Donnell, J. B. Engelhardt, S. A. Hendler, J. T. Richie and D. Jue. Outpatient geriatric evaluation and management. Results of a randomized trial. <i>Medical Care</i> 1996 Jun;34(6):624-640. 1996.                                                                                                                            |
| 125. | H. L. Wald, J. J. Glasheen, J. Guerrasio, J. M. Youngwerth and E. U. Cumbler. Evaluation of a hospitalist-run acute care for the elderly service. <i>Journal of Hospital Medicine</i> . 2011;6(6):313-321.                                                                                                                                             |
| 126. | M. Yamada, S. Nishiguchi, N. Fukutani, T. Aoyama and H. Arai. Mail-Based Intervention for Sarcopenia Prevention Increased Anabolic Hormone and Skeletal Muscle Mass in Community-Dwelling Japanese Older Adults: The INE (Intervention by Nutrition and Exercise) Study. <i>Journal of the American Medical Directors Association</i> 2015. p. 654-60. |
| 127. | M. Zak, C. Swine and T. Grodzicki. Combined effects of functionally-oriented exercise regimens and nutritional supplementation on both the institutionalised and free-living frail elderly (double-blind, randomised clinical trial). <i>BMC Public Health</i> 2009 Jan 28;9(39):Epub. 2009.                                                           |
| 128. | L. Ziden, G. Haggblom-Kronlof, S. Gustafsson, L. Lundin-Olsson and S. Dahlin-Ivanoff. Physical function and fear of falling 2 years after the health-promoting randomized controlled trial: elderly persons in the risk zone. <i>The Gerontologist</i> 2014 Jun;54(3):387-397. 2014.                                                                   |
| 129. | L. E. Aguirre and D. T. Villareal. Physical Exercise as Therapy for Frailty. <i>Nestle Nutr Inst Workshop Ser</i> . 2015;83:83-92.                                                                                                                                                                                                                     |
| 130. | M. Cesari, B. Vellas, F. Hsu, A. Newman, H. Doss, A. King, et al. A physical activity intervention to treat the frailty syndrome in older persons-results from the LIFE-P study. <i>The journals of gerontology. Series A, Biological sciences and medical sciences</i> 2015. p. 216-22.                                                               |
| 131. | S. Migliarese, N. Smith, C. Healy and A. Annas. Fighting frailty. <i>Physiotherapy (United Kingdom)</i> . 2015;101:eS1411-eS1412.                                                                                                                                                                                                                      |
| 132. | V. R. Targino, A. d. N. F. Freire, A. C. P. d. A. Sousa, N. F. B. Maciel and R. O. Guerra. Effects of a dual-task training on dynamic and static balance control of pre-frail elderly: a pilot study. <i>Fisioterapia em Movimento</i> . 2012;25(2):351-360 10p.                                                                                       |
| 133. | M. Tieland, O. van de Rest, M. L. Dirks, N. van der Zwaluw, M. Mensink, L. J. van Loon, et al. Protein supplementation improves physical performance in frail elderly people: a randomized, double-blind, placebo-controlled trial. <i>J Am Med Dir Assoc</i> . 2012;13(8):720-6.                                                                      |
| 134. | R. Armamento-Villareal, L. Aguirre, C. Qualls and D. Villareal. Effect of lifestyle intervention on the hormonal profile of frail, obese older men. <i>Journal of nutrition, health &amp; aging</i> 2016. p. 334-40.                                                                                                                                   |
| 135. | H. Berglund, H. Hasson, K. Kjellgren and K. Wilhelmson. Effects of a continuum of care intervention on frail older persons' life satisfaction: a randomized controlled study. <i>Journal of Clinical Nursing</i> . 2015;24(7/8):1079-1090 12p.                                                                                                         |
| 136. | E. F. Binder, M. Brown, D. R. Sinacore, K. Steger-May, K. E. Yarasheski and K. B. Schechtman. Effects of extended outpatient rehabilitation after hip fracture: a randomized controlled trial. <i>JAMA</i> . 2004;292(7):837-846.                                                                                                                      |
| 137. | M. Bouchonville, R. Armamento-Villareal, K. Shah, N. Napoli, D. R. Sinacore, C. Qualls, et al. Weight loss, exercise or both and cardiometabolic risk factors in obese older adults: results of a randomized controlled trial. <i>International Journal of Obesity</i> 2014 Mar;38(3):423-431. 2014.                                                   |
| 138. | S. A. Coleman, C. J. Cunningham, J. B. Walsh, D. Coakley, J. Harbison, M. Casey, et al. Outcomes among older people in a post-acute inpatient rehabilitation unit. <i>Disabil Rehabil</i> . 2012;34(15):1333-8.                                                                                                                                        |
| 139. | I. I. M. dels Angels Cebria, D. A. Arnall, C. I. Camacho and J. M. Tomas. Effects of inspiratory muscle training and yoga breathing exercises on respiratory muscle function in institutionalized frail older adults: a randomized controlled trial. <i>Journal of Geriatric Physical Therapy</i> 2014;37(2):65-75.                                    |

|      |                                                                                                                                                                                                                                                                                                                             |
|------|-----------------------------------------------------------------------------------------------------------------------------------------------------------------------------------------------------------------------------------------------------------------------------------------------------------------------------|
| 140. | T. N. Frimel, D. R. Sinacore and D. T. Villareal. Exercise attenuates the weight-loss-induced reduction in muscle mass in frail obese older adults. <i>Medicine and Science in Sports and Exercise</i> 2008 Jul;40(7):1213-1219. 2008.                                                                                      |
| 141. | D. K. Hagedorn and E. Holm. Effects of traditional physical training and visual computer feedback training in frail elderly patients. A randomized intervention study. <i>European Journal of Physical and Rehabilitation Medicine</i> . 2010;46(2):159-168.                                                                |
| 142. | P. Makai, M. Perry, S. H. Robben, H. J. Schers, M. M. Heinen, M. G. Olde Rikkert, et al. Evaluation of an eHealth intervention in chronic care for frail older people: why adherence is the first target. <i>J Med Internet Res</i> . 2014;16(6):e156.                                                                      |
| 143. | T. Nikolaus and M. Bach. Preventing falls in community-dwelling frail older people using a home intervention team (HIT): results from the randomized Falls-HIT trial. <i>Journal of the American Geriatrics Society</i> 2003 Mar;51(3):300-305. 2003.                                                                       |
| 144. | P. Peduzzi, Z. Guo, R. A. Marottoli, T. M. Gill, K. Araujo and H. G. Allore. Improved self-confidence was a mechanism of action in two geriatric trials evaluating physical interventions. <i>J Clin Epidemiol</i> . 2007;60(1):94-102.                                                                                     |
| 145. | H. Burkhardt and M. Burger. [Outcome and predictors of early geriatric rehabilitation in an acute care setting]. <i>Z Gerontol Geriatr</i> . 2012;45(2):138-45.                                                                                                                                                             |
| 146. | I. D. Cameron, N. Fairhall, C. Langron, K. Lockwood, N. Monaghan, C. Aggar, et al. A multifactorial interdisciplinary intervention reduces frailty in older people: randomized trial. <i>BMC Medicine</i> 2013 Mar 11;11(65):Epub. 2013.                                                                                    |
| 147. | H. J. Cohen, J. R. Feussner, M. Weinberger, M. Carnes, R. C. Hamdy, F. Hsieh, et al. A controlled trial of inpatient and outpatient geriatric evaluation and management. <i>The New England Journal of Medicine</i> 2002 Mar 21;346(12):905-912. 2002.                                                                      |
| 148. | E. A. Coleman, L. C. Grothaus, N. Sandhu and E. H. Wagner. Chronic care clinics: a randomized controlled trial of a new model of primary care for frail older adults. <i>Journal of the American Geriatrics Society</i> 1999 Jul;47(7):775-783. 1999.                                                                       |
| 149. | D. Cucinotta, G. Savorani, F. Piscaglia, L. Galletti, E. Petazzoni and L. Bolondi. The chronically ill elderly patients discharged from the hospital: interim report from a controlled study of home care attendance. <i>Arch Gerontol Geriatr Suppl</i> . 2004(9):103-8.                                                   |
| 150. | N. Fairhall, C. Sherrington, S. E. Kurrle, S. R. Lord, K. Lockwood and I. D. Cameron. Effect of a multifactorial interdisciplinary intervention on mobility-related disability in frail older people: randomised controlled trial. <i>BMC Medicine</i> 2012 Oct 15;10(120):Epub. 2012.                                      |
| 151. | N. Fairhall, C. Sherrington, S. E. Kurrle, S. R. Lord, K. Lockwood, K. Howard, et al. Economic evaluation of a multifactorial, interdisciplinary intervention versus usual care to reduce frailty in frail older people. <i>J Am Med Dir Assoc</i> . 2015;16(1):41-8.                                                       |
| 152. | N. Fairhall, C. Sherrington, S. R. Lord, S. E. Kurrle, C. Langron, K. Lockwood, et al. Effect of a multifactorial, interdisciplinary intervention on risk factors for falls and fall rate in frail older people: a randomised controlled trial. <i>Age and ageing</i> . 2014;43(5):616-622.                                 |
| 153. | N. Fairhall, C. Sherrington, S. R. Lord, S. E. Kurrle, C. Langron, K. Lockwood, et al. Effect of a multifactorial, interdisciplinary intervention on risk factors for falls and fall rate in frail older people: a randomised controlled trial [with consumer summary]. <i>Age and Ageing</i> 2014 Sep;43(5):616-622. 2014. |
| 154. | M. Germain, F. Knoeffel, D. Wieland and L. Z. Rubenstein. A geriatric assessment and intervention team for hospital inpatients awaiting transfer to a geriatric unit: a randomized trial. <i>Aging</i> 1995 Feb;7(1):55-60. 1995.                                                                                           |
| 155. | R. Giannini, E. Petazzoni, G. Savorani, L. Galletti, F. Piscaglia, F. Licastro, et al. Outcomes from a program of home care attendance in very frail elderly subjects. <i>Arch Gerontol Geriatr</i> . 2007;44(2):95-103.                                                                                                    |

|      |                                                                                                                                                                                                                                                                                                                                |
|------|--------------------------------------------------------------------------------------------------------------------------------------------------------------------------------------------------------------------------------------------------------------------------------------------------------------------------------|
| 156. | N. Hall, P. de Beck, D. Johnson, K. Mackinnon, G. Gutman and N. Glick. Randomized trial of a health promotion program for frail elders. <i>Canadian Journal on Aging</i> . 1992;11(1):72-91.                                                                                                                                   |
| 157. | L. Hempenius, J. Slaets, D. Asselt, T. Bock, T. Wiggers and B. Leeuwen. Long Term Outcomes of a Geriatric Liaison Intervention in Frail Elderly Cancer Patients. <i>PLoS one</i> 2016. p. e0143364.                                                                                                                            |
| 158. | K. Hinkka, S. Karppi, T. Pohjolainen, T. Rantanen, P. Puukka and R. Tilvis. Network-based geriatric rehabilitation for frail elderly people: feasibility and effects on subjective health and pain at one year. <i>Journal of Rehabilitation Medicine (Stiftelsen Rehabiliteringsinformation)</i> . 2007;39(6):473-478 6p.     |
| 159. | E. O. Hoogendijk, H. E. van der Horst, P. M. van de Ven, J. W. Twisk, D. J. Deeg, D. H. Frijters, et al. Effectiveness of a Geriatric Care Model for frail older adults in primary care: Results from a stepped wedge cluster randomized trial. <i>Eur J Intern Med</i> . 2015.                                                |
| 160. | M. Houles. Randomised study of a multi-disciplinary programme focusing on geriatric syndromes in vulnerable, elderly individuals living at home (Dutch EASYcare Study). [French]. <i>Cahiers de l'Annee Gerontologique</i> 2010. p. 166-8.                                                                                     |
| 161. | T. T. Kircher, H. Wormstall, P. H. Muller, F. Schwarzler, G. Buchkremer, K. Wild, et al. A randomised trial of a geriatric evaluation and management consultation services in frail hospitalised patients. <i>Age Ageing</i> . 2007;36(1):36-42.                                                                               |
| 162. | F. Landi, G. Gambassi, R. Pola, S. Tabaccanti, T. Cavinato, P. U. Carbonin, et al. Impact of integrated home care services on hospital use. <i>J Am Geriatr Soc</i> . 1999;47(12):1430-4.                                                                                                                                      |
| 163. | W. J. Lee, L. N. Peng, Y. Y. Cheng, C. Y. Liu, L. K. Chen and H. C. Yu. Effectiveness of short-term interdisciplinary intervention on postacute patients in Taiwan. <i>J Am Med Dir Assoc</i> . 2011;12(1):29-32.                                                                                                              |
| 164. | A. Y. Leung, V. W. Lou, K. S. Chan, A. Yung and I. Chi. Care management service and falls prevention: a case-control study in a Chinese population. <i>J Aging Health</i> . 2010;22(3):348-61.                                                                                                                                 |
| 165. | S. G. Leveille, E. H. Wagner, C. Davis, L. Grothaus, J. Wallace, M. LoGerfo, et al. Preventing disability and managing chronic illness in frail older adults: a randomized trial of a community-based partnership with primary care. <i>Journal of the American Geriatrics Society</i> 1998 Oct;46(10):1191-1198. 1998.        |
| 166. | C. M. Li, C. Y. Chen, C. Y. Li, W. D. Wang and S. C. Wu. The effectiveness of a comprehensive geriatric assessment intervention program for frailty in community-dwelling older people: a randomized, controlled trial. <i>Archives of Gerontology and Geriatrics</i> 2010 Feb;50(Suppl 1):S39-S42. 2010.                      |
| 167. | W. M. Looman, I. N. Fabbriotti, R. de Kuyper and R. Huijsman. The effects of a pro-active integrated care intervention for frail community-dwelling older people: a quasi-experimental study with the GP-practice as single entry point. <i>BMC Geriatr</i> . 2016;16:43.                                                      |
| 168. | W. C. Mann, K. J. Ottenbacher, L. Fraas, M. Tomita and C. V. Granger. Effectiveness of assistive technology and environmental interventions in maintaining independence and reducing home care costs for the frail elderly. A randomized controlled trial. <i>Archives of Family Medicine</i> 1999 May-Jun;8(3):210-217. 1999. |
| 169. | A. L. Melin. A randomized trial of multidisciplinary in-home care for frail elderly patients awaiting hospital discharge. <i>Aging</i> . 1995;7(3):247-250.                                                                                                                                                                    |
| 170. | A. L. Melin and L. O. Bygren. Perceived functional health of frail elderly in a primary home care programme and correlation of self-perception with objective measurements. <i>Scand J Soc Med</i> . 1993;21(4):256-63.                                                                                                        |
| 171. | R. J. Melis, M. I. van Eijken, S. Teerenstra, T. van Achterberg, S. G. Parker, G. F. Borm, et al. A randomized study of a multidisciplinary program to intervene on geriatric syndromes in vulnerable older people who live at home (Dutch EASYcare Study). <i>J Gerontol A Biol Sci Med Sci</i> . 2008;63(3):283-90.          |

|      |                                                                                                                                                                                                                                                                                                |
|------|------------------------------------------------------------------------------------------------------------------------------------------------------------------------------------------------------------------------------------------------------------------------------------------------|
| 172. | S. F. Metzelthin, E. Van Rossum, L. P. De Witte, A. Ambergen, S. Hobma, W. Sipers, et al. Frail elderly people living at home; effects of an interdisciplinary primary care programme. <i>Nederlands Tijdschrift voor Geneeskunde</i> . 2014;158(17).                                          |
| 173. | S. F. Metzelthin, E. van Rossum, L. P. de Witte, A. W. Ambergen, S. O. Hobma, W. Sipers, et al. Effectiveness of interdisciplinary primary care approach to reduce disability in community dwelling frail older people: cluster randomised controlled trial. <i>BMJ</i> . 2013;347:f5264.      |
| 174. | R. Monteserin, C. Brotons, I. Moral, S. Altimir, A. S. Jose, S. Santaeugenia, et al. Effectiveness of a geriatric intervention in primary care: a randomized clinical trial. <i>Family Practice</i> 2010 Jun;27(3):239-245. 2010.                                                              |
| 175. | K. Ollonqvist, T. Aaltonen, S. L. Karppi, K. Hinkka and S. Pontinen. Network-based rehabilitation increases formal support of frail elderly home-dwelling persons in Finland: randomised controlled trial. <i>Health Soc Care Community</i> . 2008;16(2):115-25.                               |
| 176. | K. Rockwood, K. Stadnyk, D. Carver, K. M. MacPherson, H. E. Beanlands, C. Powell, et al. A clinimetric evaluation of specialized geriatric care for rural dwelling, frail older people. <i>Journal of the American Geriatrics Society</i> . 2000;48(9):1080-1085 6p.                           |
| 177. | L. Z. Rubenstein, K. R. Josephson, J. O. Harker, D. K. Miller and D. Wieland. The Sepulveda GEU Study revisited: long-term outcomes, use of services, and costs. <i>Aging</i> 1995 Jun;7(3):212-217. 1995.                                                                                     |
| 178. | L. Z. Rubenstein, K. R. Josephson, G. D. Wieland, P. A. English, J. A. Sayre and R. L. Kane. Effectiveness of a geriatric evaluation unit. A randomized clinical trial. <i>The New England Journal of Medicine</i> 1984 Dec 27;311(26):1664-1670. 1984.                                        |
| 179. | C. D. Rubin, M. T. Sizemore, P. A. Loftis and N. Loret de Mola. Randomized controlled trial of outpatient geriatric evaluation and management in a large public hospital. <i>Journal of the American Geriatrics Society</i> . 1993;41(10):1023-1028.                                           |
| 180. | F. G. Ruikes, S. U. Zuidema, R. P. Akkermans, W. J. Assendelft, H. J. Schers and R. T. Koopmans. Multicomponent Program to Reduce Functional Decline in Frail Elderly People: A Cluster Controlled Trial. <i>J Am Board Fam Med</i> . 2016;29(2):209-17.                                       |
| 181. | I. Saltvedt, M. Jordhoy, M. E. S. Opdahl, P. Fayers, S. Kaasa and O. Sletvold. Randomised trial of in-hospital geriatric intervention: impact on function and morale. <i>Gerontology</i> 2006 Jul;52(4):223-230. 2006.                                                                         |
| 182. | I. Saltvedt, E. S. O. Mo, P. Fayers, S. Kaasa and O. Sletvold. Reduced mortality in treating acutely sick, frail older patients in a geriatric evaluation and management unit. A prospective randomized trial. <i>Journal of the American Geriatrics Society</i> 2002 May;50(5):792-798. 2002. |
| 183. | I. Saltvedt, T. Saltnes, E. S. Mo, P. Fayers, S. Kaasa and O. Sletvold. Acute geriatric intervention increases the number of patients able to live at home. A prospective randomised study. <i>Aging Clinical and Experimental Research</i> 2004 Aug;16(4):300-306. 2004.                      |
| 184. | H. E. J. Senior, M. Parsons, N. Kerse, M.-H. Chen, S. Jacobs, S. V. Hoorn, et al. Promoting independence in frail older people: a randomised controlled trial of a restorative care service in New Zealand. <i>Age &amp; Ageing</i> . 2014;43(3):418-424 7p.                                   |
| 185. | A. L. Siu, R. L. Kravitz, E. Keeler, K. Hemmerling, R. Kington, J. W. Davis, et al. Postdischarge geriatric assessment of hospitalized frail elderly patients. <i>Archives of Internal Medicine</i> . 1996;156(1):78-81.                                                                       |
| 186. | J. Subra, S. Gillette-Guyonnet, M. Cesari, S. Oustric and B. Vellas. The integration of frailty into clinical practice: preliminary results from the Gerontopole. <i>J Nutr Health Aging</i> . 2012;16(8):714-20.                                                                              |
| 187. | N. Tavassoli, S. Guyonnet, G. Abellan Van Kan, S. Sourdet, T. Krams, M. E. Soto, et al. Description of 1,108 older patients referred by their physician to the "Geriatric Frailty Clinic (G.F.C)                                                                                               |

for Assessment of Frailty and Prevention of Disability" at the gerontopole. J Nutr Health Aging. 2014;18(5):457-64.

188. M. Trentini, S. Semeraro and M. Motta. Effectiveness of geriatric evaluation and care. One-year results of a multicenter randomized clinical trial. Aging 2001 Oct;13(5):395-405. 2001.

189. M. E. Williams, T. F. Williams, J. G. Zimmer, W. J. Hall and C. A. Podgorski. How does the team approach to outpatient geriatric evaluation compare with traditional care: a report of a randomized controlled trial. Journal of the American Geriatrics Society. 1987;35(12):1071-1078.

190. C. H. Winograd, M. B. Gerety and N. A. Lai. A negative trial of inpatient geriatric consultation. Lessons learned and recommendations for future research. Archives of Internal Medicine 1993 Sep 13;153(17):2017-2023. 1993.

| Supplementary table 2: Secondary outcomes           |                   |                                                                                                                                   |        |           |           |
|-----------------------------------------------------|-------------------|-----------------------------------------------------------------------------------------------------------------------------------|--------|-----------|-----------|
| Study                                               | -3 m <sup>a</sup> | Post-intervention (0 m)                                                                                                           | 3 m FU | 6 m<br>FU | 9 m<br>FU |
| <b>Quality of life</b>                              |                   |                                                                                                                                   |        |           |           |
| Chan: Ex + NuAd +<br>PS (32)                        | /                 | NS                                                                                                                                | NS     | /         | NS        |
| Tarazona-<br>Santabalbina: Ex +<br>NuAd + NuVM (54) | /                 | Ex + NuAd + NuVM (8.2±1.6): significantly improved<br>*compared to NuAd + NuVM group (7.6±1.3)                                    | /      | /         | /         |
| <b>Psychosocial well-being/ depression</b>          |                   |                                                                                                                                   |        |           |           |
| Kwon: Ex + NuAd<br>(44)                             | /                 | Ex + NuAd (7.2±13.5): change significantly improved ** in<br>role emotional score compared to control group (-0.3±13.4)<br>Ex: NS | /      | NS        | /         |
| Chin A Paw: Ex +<br>NuP + NuVM (34)                 | /                 | NS                                                                                                                                | /      | /         | /         |
| Chan: Ex + NuAd +<br>PS (32)                        | /                 | NS                                                                                                                                | NS     | /         | NS        |
| Tarazona-<br>Santabalbina: Ex +<br>NuAd + NuVM (54) | /                 | Ex + NuAd + NuVM (2.3±2.2): significantly improved<br>*compared to NuAd + NuVM group (3.2±2.5)                                    | /      | /         | /         |
| <b>Social involvement</b>                           |                   |                                                                                                                                   |        |           |           |

|                                                     |   |                                                                                                  |   |    |   |
|-----------------------------------------------------|---|--------------------------------------------------------------------------------------------------|---|----|---|
| Chin A Paw: Ex +<br>NuP + NuVM (34)                 | / | NS                                                                                               | / | /  | / |
| Tarazona-<br>Santabalbina: Ex +<br>NuAd + NuVM (54) | / | Ex + NuAd + NuVM (45.5±9.3): significantly improved<br>*compared to NuAd + NuVM group (41.2±8.5) | / | /  | / |
| <b>Subjective health/ health belief model</b>       |   |                                                                                                  |   |    |   |
| Chin A Paw: Ex +<br>NuP + NuVM (34)                 | / | NS                                                                                               | / | /  | / |
| Rydwik: Ex + NuAd<br>(46)                           | / | NS                                                                                               | / | NS | / |

Values are (mean ± SD) or (median (10th – 90th percentile)) unless otherwise indicated.

\*: p-value < 0.05; \*\*: p-value < 0.01; \*\*\*: p-value < 0.001; <sup>a</sup> = 3 m before end of intervention; FU = follow-up; Hor:

Hormone; Ex: Exercise intervention; Cog: Cognitive intervention; NuVM: Nutritional supplementation of vitamins and

minerals; NuP: Nutritional supplementation of proteins; NuMF: Nutritional supplementation of MFGM; PS: psychosocial

intervention; NS: no significant difference; /: not available; CI: 95% confidence interval
